# Supplementary material for: Point-of-care diagnostic assay for the detection of Zika virus using the recombinase polymerase amplification method
Source: PubMed Central journal article supplement (PMC6171711; doi:10.1099/jgv.0.001083), 2018-06-13
Supplement: jgv-99-1012-s001.pdf [file jgv-99-1012-s001.pdf]

## 1 **Supplementary material Figure and Table legends**

### 2 **Sup. Table 1**

3 Time to positive (TTP) signal in the detection of low copy number of ZIKV synthetic RNA  
4 template 5 (from  $5 \times 10^1$  to  $5 \times 10^{-1}$  copies per reaction) and compared to the non-template  
5 control (NTC) using the ZIKV RT-RPA assay. For comparison, the time necessary to detect  
6 the target using the published Zika RT-PCR is also shown.

7

### 8 **Sup. Table 2**

9 Confirmation of the specificity of the ZIKV RT-RPA assay using a selection Dengue-positive  
10 and 4 Chikungunya-positive clinical samples. The Dengue-positive and Chikungunya-  
11 positive status of the samples was confirmed by Dengue-specific and Chikungunya-specific  
12 RT-PCR, respectively, with outcomes and Ct values indicated.

13

### 14 **Sup. Fig. 1**

15 Sequences of the synthetic fragments used in the ZIKV RPA assay development and ZIKV  
16 RPA amplified region within utilised extracted ZIKV genomes.

17 a. Synthetic fragments 1 (Template 1 – EU545988), 2 (Template 2 – KJ776791), 3  
18 (Template 3 – KU321639), 4 (Template 4 – KU365778) and 5 (Template 5 –  
19 KU365780) sequences shown 5'→3' direction. Underlined within each sequence are the  
20 T7 promoter at the 5'-end and the SP6 promoter at the 3'-end, used to amplify and  
21 synthesize the synthetic RNA fragments.

22 b. Sequences of the ZIKV RPA region of the African ZIKV (Strain MP1751, KY288905,  
23 from Uganda, 1962) and the South American ZIKV (Strain PRVABC59, KU501215,  
24 from Puerto Rico, 2015)

25

26 **Sup. Fig. 2**

27 Agarose gel analysis of the sizes of fragments generated in the ZIKV RT-RPA assay using  
28 synthetic fragments (Templates 1-5) and extracted ZIKV nucleic acid (African and South  
29 American Zika virus strains). Nuclease-free water instead of nucleic acid was used as a non-  
30 template control (NTC). Relative fragment sizes were confirmed using the E-Gel<sup>®</sup> Low  
31 Range Quantitative DNA Ladder and marker sizes are indicated on the gel image.

32

33 **Sup. Fig. 3**

34 ZIKV RT-RPA assay sensitivity and performance using low copy number of template in  
35 comparison to ZIKV RT-PCR. Fluorescent signal generated from the amplification of 50, 5  
36 and 0.5 copies per reaction of Zika synthetic RNA template 5 (KU365780) and compared to  
37 the non-template control (NTC) using the ZIKV RT-RPA assay. Amplification curves show  
38 the average total fluorescence values from five independent ZIKV RT-RPA assays; standard  
39 deviations are represented as error bars.

40

41 **Sup. Fig. 4**

42 Detection of cultured extracted Spondweni virus nucleic acid using the ZIKV RT-RPA assay.  
43 Signal from dilutions of  $1 \times 10^{-2}$  and  $1 \times 10^{-4}$  of the neat extracted Spondweni viral RNA are  
44 compared to signal generated using  $1 \times 10^{-4}$  dilution of neat extracted ZIKV RNA. Nuclease-

45 free water used in place of viral nucleic acid represents the non-template control (NTC).

46 Amplification curves show the average total fluorescence values from three independent

47 ZIKV RT-RPA assays, standard deviations are represented as error bars.

48

# Sup. Fig. 1

## Template 1 (EU545988)

**GCGCTAATACGACTCACTATAGGG**TGCTATGAGGCATCAATATCGGACATGGCTTCGGACAGCCGCTGCCCAACACAAGGTGAAGCCTACCTTGACAAGCAGTCAGACACTCAATATGTCTGCAAAAGAACGTTAGTGGACAGAGGCTGGGGAAATGGATGTGGACTTTTTGGCAAAGGGAGCCTGGTGACATGCGCTAAGTTTGCATGCTCCAA  
GAAAATGACCGGGAAGAGCATCCAGCCAGAGAATCTGGAGTACCGGATAATGCTGTCAGTTCATGGCTCCCAGCACAGTGGGATGATCGTTAATGACACAGGACATG  
AAACTGATGAGAATAGAGCGAAGGTTGAGATAACGCCAATTCACCAAGAGCTGAAGCCACCCTGGGGGGTTTTGGAAGCCTAGGACTTGATTGTGAACCGAGGACA  
GGCCTTGACTTTTTAGATTTGTATTACTTGACTATGAATAACAAGCACTGGTTGGTTCACAAGGAGTGGTTCCACGACATTCCATTACCTTGGCATGCTGGGGCAGACA  
CCGGAACTCCACATTGGAACAACAAGAAGCATTGGTAGAGTTCAAGGACGCACATGCCAAAAGGCCAACTGTCGTGGTTCTAGGGAGTCAAGAAGGAGCAGTTCACA  
CGGCCCTTGCTGGAGCTCTGGAGGCTGAGATGGATGGTGCAAAGGGAAGGCTGTCCTCTGGCCACTTGAATGTCGCCTGAAAATGGATAAACTTAGATTGAAGGGC  
GTGTCATACTCCTTGTGTACCGCAGCGTTCACATTCACCAAGATCCCGGCTGAAACTGCACGGGACAGTACAGTGGAGGTACAGTACGCAGGGACAGATGGACC  
CTGCAAGGTTCCAGCTCAGATGGCGGTGGACATGCAAACCTGACCCCAGTTGGGAGGCTGATAACCGCTAACCCCTGTAATCACTGAAAGCACTGAGAAGCTAAGAT  
GATGCTGGAACCTGATCCACCATTTGGGACTCTTACATTGTCATAGGAGTCGGGGAGAAGAAGATCACCCATCACTGGCACAGGAGTGGCAGCACCATTGGAAAAGC  
ATTTGAAGCCACTGTGAGAGGTGCCAAGAGAATGGCAGTCTTGGGAGACACAGCCTGGGATTTTGGATCAGTTGGAGGTGCTCTCAACTCATTGGGCAAGGGCATCC  
ATCAAATTTTTGGAGCAGCTTTCAAATCATTGTTTGGAGGAATGTCCTGGTTCTCACAATTTCTCATTGGAACGTTGCTGGTGTGGTTGGGTCTGAATACAAAGAATGGA  
TCTATTTCCCTTACGTGCTTGGCCTTAGGGGGAGTGTGATCTTTTTATCCACAGCCGTCTCTGCTGATGTGGGGTCTCGGTGGACTTCTCAAAGAAGGAAACGAGAT  
GCGGTACGGGGTGTTCGTCTATAACGACGTTGATGCCTGGAGGGACAGGTACAAGTACCATCCTGACTCCCCTCGTAGATTAGCAGCAGCAGTCAAGCAAGCCTGG  
GAAGATGGGATCTGTGGGATCTCCTCTGTTTCAAGAATGAAAACATCATGTGGAGATCAGTAGAAGGGGAGCTCAACGCAATCCTGGAAGAGAATGGAGTTCAACTG  
ACGGTCTGTTGTGGGATCTGTAAAAAACCCCATGTGGAGAGGTCCACAGAGATTGCCCGTGCCTGTGAACGAGCTGCCCCACGGCTGGAAGGCTTGGGGGAAATCGTA  
CTTCGTGAGAGCAGCAAAGACAAATAACAGCTTTGTCGTGGATGGTGACACACTGAAGGAATGCCCACTCAAACATAGAGCATGGAACAGCTTTCTTGTGGAGGATCA  
TGGGTTCCGGGTATTTCA**TTCTATAGTGTACCTAAATGCGC**

## Template 2 (KJ776791)

**GCGCTAATACGACTCACTATAGGG**TGCTATGAGGCATCAATATCGGACATGGCTTCGGACAGCCGCTGCCCAACACAAGGTGAAGCCTACCTTGACAAGCAATCAGACACTCAATATGTCTGCAAAAGAACGTTAGTGGACAGAGGCTGGGGAAATGGATGTGGACTTTTTGGCAAAGGGAGCCTGGTGACATGCGCTAAGTTTGCATGCTCCAA  
GAAAATGACCGGGAAGAGCATCCAGCCAGAGAATCTGGAGTACCGGATAATGCTGTCAGTTCATGGCTCCCAGCACAGTGGGATGATCGTTAATGACACAGGACATG  
AAACTGATGAGAATAGAGCGAAGGTTGAGATAACGCCAATTCACCAAGAGCCGAAGCCACCCTGGGGGGTTTTGGAAGCCTAGGACTTGATTGTGAACCGAGGACA  
GGCCTTGACTTTTTAGATTTGTATTACTTGACTATGAATAACAAGCACTGGTTGGTTCACAAGGAGTGGTTCCACGACATTCCATTACCTTGGCACGCTGGGGCAGACA  
CCGGAACTCCACACTGGAACAACAAGAAGCACTGGTAGAGTTCAAGGACGCACATGCCAAAAGGCCAACTGTCGTGGTTCTAGGGAGTCAAGAAGGAGCAGTTCAC  
ACGGCCCTTGCTGGAGCTCTGGAGGCTGAGATGGATGGTGCAAAGGGAAGGCTGTCCTCTGGCCACTTGAATGTCGCCTGAAAATGGATAAACTTAGATTGAAGGG  
CGTGTACTACTCCTTGTGTACCGCAGCGTTCACATTCACCAAGATCCCGGCTGAAACTGCACGGGACAGTACAGTGGAGGTACAGTACGCAGGGACAGATGGAC  
CTTGCAAGGTTCCAGCTCAGATGGCGGTGGACATGCAAACCTGACCCAGTTGGGAGTTGATAACCGCTAACCCCTGTAATCACTGAAAGCACTGAGAACCTAAGA  
TGATGCTGGAACCTGATCCACATTTGGGACTCTTACATTGTCATAGGAGTCCGGGAGAAGAAGATCACCCACTGGCACAGGAGTGGCAGCACCATTGGAAAAG  
CATTTGAAGCCACTGTGAGAGGTGCCAAGAGAATGGCAGTCTTGGGAGACACAGCCTGGGACTTTGGATCAGTTGGAGGCGCTCTCAACTCATTGGGCAAGGGCATC  
CATCAAATTTTTGGAGCAGCTTTCAAATCATTGTTTGGAGGAATGTCCTGGTTCTCACAATTTCTCATTGGAACGTTGCTGATGTGGTTGGGTCTGAACACAAAGAATGG  
ATCTATTTCCCTTATGTGCTTGGCCTTAGGGGGAGTGTGATCTTCTTATCCACAGCTGTCTCTGCTGATGTGGGGTGTCTCGGTGGACTTCTCAAAGAAGGAGACGAGA  
TGCGGTACAGGGGTGTTCGTCTATAACGACGTTGAAGCCTGGAGGGACAGGTACAAGTACCATCCTGACTCCCCCGTAGATTGGCAGCAGCAGTCAAGCAAGCCTG  
GGAAGATGGTATCTGTGGGATCTCCTCTGTTTCAAGAATGAAAACATCATGTGGAGATCAGTAGAAGGGGAGCTCAACGCAATCCTGGAAGAGAATGGAGTTCAACT  
GACGGTCTGTTGTGGGATCTGTAAAAAACCCCATGTGGAGAGGTCCACAGAGATTGCCCGTGCCTGTGAACGAGCTGCCCCACGGCTGGAAGGCTTGGGGGAAATCG  
TACTTCGTGAGAGCAGCAAAGACAAATAACAGCTTTGTCGTGGATGGTGACACACTGAAGGAATGCCCACTCAAACATAGAGCATGGAACAGCTTTCTTGTGGAGGAT  
CATGGGTTCCGGGTATTTCA**TTCTATAGTGTACCTAAATGCGC**

### Template 3 (KU321639)

**CGCCTAATACGACTCACTATAGGG**TGCTATGAGGCATCAATATCAGACATGGCTTCGGACAGCCGCTGCCAACACAAGGTGAAGCCTACCTTGACAAGCAATCAGACACTCAATATGTCTGCAAAAGAACGTTAGTGGACAGAGGCTGGGGAAATGGATGTGGACTTTTTGGCAAAGGGAGTCTGGTGACATGCGCTAAGTTTGCATGCTCCAA  
GAAAATGACCGGGAAGAGCATCCAGCCAGAGAATCTGGAGTACCGGATAATGCTGTCAGTTCATGGCTCCCAGCACAGTGGGATGATCGTTAATGACACAGGACATG  
AACTGATGAGAATAGAGCGAAGGTTGAGATAACGCCAATTCACCAAGAGCCGAAGCCACCCTGGGGGGTTTTGGAAGCCTAGGACTTGATTGTGAACCGAGGACA  
GGCCTTGACTTTTTCAGATTTGTATTACTTGACTATGAATAACAAGCACTGGTTGGTTCACAAGGAGTGGTTCACGACATTCCATTACCTTGGCAGCTGGGGCAGACA  
CCGGAACTCCACACTGGAACAACAAGAAGCACTGGTAGAGTTCAAGGACGCACATGCCAAAAGGCCAACTGTCTGGTTCTAGGGAGTCAAGAAGGAGCAGTTCCAC  
ACGGCCCTTGCTGGAGCTCTGGAGGCTGAGATGGATGGTGCAAAGGGAAGGCTGTCTCTGGCCACTTGAAATGTGCGCTGAAAATGGATAAACTTAGATTGAAGGG  
CGTGTCACTACTCCTTGTGTACCGCAGCGTTCACATTCACCAAGATCCCGGCTGAAACACTGCACGGGACAGTACAGTGGAGGTACAGTACGCAGGGACAGATGGAC  
CTTGCAAGGTTCCAGCTCAGATGGCGGTGGACATGCAAACCTGACCCAGTTGGGAGGTTGATAACCGCTAACCCCGTAATCACTGAAAGCACTGAGAACTCTAAGA  
TGATGCTGGAACCTTGATCCACCATTTGGGGACTCTTACATTGTCTATAGGAGTTCGGGGAGAAGAAGATCACCCACCCTGGCAGGAGTGGCAGCACCATTGGAAAAG  
CATTTGAAGCCACTGTGAGAGGTGCCAAGAGAATGGCAGTCTTGGGAGACACAGCCTGGGACTTTGGATCAGTTGGAGGCGCTCTCAACTCATTGGGCAAGGGCATC  
CATCAAATTTTTGGAGCAGCTTTCAAATCATTGTTTGGAGGAATGTCTGGTTCTCACAATTTCTCATTGGAACGTTGCTGATGTGGTTGGGTCTGAACACAAAGAATGG  
ATCTATTTCCCTTATGTGCTTGGCCTTAGGGGGAGTGTGATCTTCTTATCCACAGCCGTCTCTGCTGATGTGGGGTGTCTCGGTGGACTTCTCAAAGAAGGAGACGAG  
ATGCGGTACAGGGGTGTTCTGTCTATAACGACGTTGAAGCCTGGAGGGACAGGTACAAGTACCATCCTGACTCCCCCGTAGATTGGCAGCAGCAGTCAAGCAAGCCT  
GGGAAGATGGTATCTGCGGGATCTCCTCTGTTTCAAGAATGAAAACATCATGTGGAGATCAGTAGAAGGGGAGCTCAACGCAATCCTGGAAGAGAATGGAGTTCAAC  
TGACGGTCTGTTGGGATCTGAAAAAACCCATGTGGAGAGGTCCACAGAGATTGCCCGTGCCTGTGAACGAGCTGCCCCACGGCTGGAAGGCTTGGGGGAAATC  
GCACTTCGTACAGAGCAGCAAAGACAATAACAGCTTTGTCTGGATGGTGACACACTGAAGGAATGCCCACTCAAACATAGAGCATGGAACAGCTTTCTTGTGGAGGA  
TCATGGGTTCCGGGTATTTCATTCTATAGTGTACCTAAATGCGC

### Template 4 (KU365778)

**CGCCTAATACGACTCACTATAGGG**TGCTATGAGGCATCAATATCAGACATGGCTTCGGACAGCCGCTGCCAACACAAGGTGAAGCCTACCTTGACAAGCAATCAGACACTCAATATGTCTGCAAAAGAACGTTAGTGGACAGAGGCTGGGGAAATGGATGTGGACTTTTTGGCAAAGGGAGCCTGGTGACATGCGCTAAGTTTGCATGCTCCAA  
GAAAATGACCGGGAAGAGCATCCAGCCAGAGAATCTGGAGTACCGGATAATGCTGTCAGTTCATGGCTCCCAGCACAGTGGGATGATCGTTAATGACACAGGACATG  
AACTGATGAGAATAGAGCGAAAGTTGAGATAACGCCAATTCACCAAGAGCCGAAGCCACCCTGGGGGGTTTTGGAAGCCTAGGACTTGATTGTGAACCGAGGACA  
GGCCTTGACTTTTTCAGATTTGTATTACTTGACTATGAATAACAAGCACTGGTTGGTTCACAAGGAGTGGTTCACGACATTCCATTACCTTGGCAGCTGGGGCAGACA  
CCGGAACCTCACACTGGAACAACAAGAAGCACTGGTAGAGTTCAAGGACGCACATGCCAAAAGGCCAACTGTCTGGTTCTAGGGAGTCAAGAAGGAGCAGTTCCAC  
ACGGCCCTTGCTGGAGCTCTGGAGGCTGAGATGGATGGTGCAAAGGGAAGGCTGTCTCTGGCCACTTGAAATGTGCGCTGAAAATGGATAAACTTAGATTGAAGGG  
CGTGTCACTACTCCTTGTGTACTGCAGCGTTCACATTCACCAAGATCCCGGCTGAAACACTGCACGGGACAGTACAGTGGAGGTACAGTACGCAGGGACAGATGGAC  
CTTGCAAGGTTCCAGCTCAGATGGCGGTGGACATGCAAACCTGACCCAGTTGGGAGGTTGATAACCGCTAACCCCGTAATCACTGAAAGCACTGAGAACTCTAAGA  
TGATGCTGGAACCTTGATCCACCATTTGGGGACTCTTACATTGTCTATAGGAGTTCGGGGAGAAGAAGATCACCCACCCTGGCAGGAGTGGCAGCACCATTGGAAAAG  
CATTTGAAGCCACTGTGAGAGGTGCCAAGAGAATGGCAGTCTTGGGAGACACAGCCTGGGACTTTGGATCAGTTGGAGGCGCTCTCAACTCATTGGGCAAGGGCATC  
CATCAAATTTTTGGAGCAGCTTTCAAATCATTGTTTGGAGGAATGTCTGGTTCTCACAATTTCTCATTGGAACGTTGCTGATGTGGTTGGGTCTGAACACAAAGAATGG  
ATCTATTTCCCTTATGTGCTTGGCCTTAGGGGGGGTGTGATCTTCTTATCCACAGCCGTCTCTGCTGATGTGGGGTGTCTCGGTGGACTTCTCAAAGAAGGAGACGAG  
ATGCGGTACAGGGGTGTTCTGTCTATAACGACGTTGAAGCCTGGAGGGACAGGTACAAGTACCATCCTGACTCCCCCGTAGATTGGCAGCAGCAGTCAAGCAAGCCT  
GGGAAGATGGTATCTGCGGGATCTCCTCTGTTTCAAGAATGAAAACATCATGTGGAGATCAGTAGAAGGGGAGCTCAACGCAATCCTGGAAGAGAATGGAGTTCAAC  
TGACGGTCTGTTGGGATCTGAAAAAACCCATGTGGAGAGGTCCACAGAGATTGCCCGTGCCTGTGAACGAGCTGCCCCACGGCTGGAAGGCTTGGGGGAAATC  
GTACTTCGTACAGAGCAGCAAAGACAATAACAGCTTTGTCTGGATGGTGACACACTGAAGGAATGCCCACTCAAACATAGAGCATGGAACAGCTTTCTTGTGGAGGA  
TCATGGGTTCCGGGTATTTCATTCTATAGTGTACCTAAATGCGC

## Template 5 (KU365780)

**CGCCTAATACGACTCACTATAGGG**TGCTATGAGGCATCAATATCAGACATGGCTTCGGACAGCCGCTGCCAACACAAGGTGAAGCCTACCTTGACAAGCAATCAGACACTCAATATGTCTGCAAAAGAACGTTAGTGGACAGAGGCTGGGGAAATGGATGTGGACTTTTTGGCAAAGGGAGCCTGGTGACATGCGCTAAGTTTGCATGCTCCAA  
GAAAATGACCGGGAAGAGCATCCAGCCAGAGAATCTGGAGTACCGGATAATGCTGTCAGTTCATGGCTCCCAGCACAGTGGGATGATTGTTAATGACACAGGACATGA  
AACTGATGAGAATAGAGCGAAAAGTTGAGATAACGCCCAATTCACCAAGAGCCGAAGCCACCCTGGGGGGTTTTGGAAGCCTAGGACTTGATTGTGAACCGAGGACAG  
GCCTTGACTTTTTAGATTTGTATTACTTGACTATGAATAACAAGCACTGGTTGGTTCACAAGGAGTGGTTCCACGACATTCCATTACCTTGGCAGCTGGGGCAGACAC  
CGGAACTCCACACTGGAACAACAAAGAAGCACTGGTAGAGTTC AAGGACGCACATGCCAAAAGGCCAAACTGTCGTGGTTCTAGGGAGTCAAGAAGGAGCAGTTCACA  
CGGCCCTTGCTGGAGCTCTGGAGGCTGAGATGGATGGTGCAAAGGGGAAGGCTGTCTCTGGCCACTTCAAATGTGCGCTGAAAATGGATAAACTTAGATTGAAGGGC  
GTGTCATACTCCTTGTGTACTGCAGCGTTCACATTCACCAAGATCCCAGGCTGAAACACTGCACGGGACAGTACAGTGGAGGTACAGTACGCAGGGACAGATGGACC  
TTGCAAGTTCCAGCTCAGATGGCGGTGGACATGCAAACCTGACCCCAGTTGGGAGTTGATAACCGCTAACCCCGTAATCACTGAAAGCACTGAGAACTCTAAGAT  
GATGCTGGAACCTTGATCCACCATTTGGGGACTCTTACATTGTTCATAGGAGTCCGGGAGAAGAAGATCACCCACCCTGGCACAGGAGTGGCAGCACCATTGGAAAAG  
CATTTGAAGCCACTGTGAGAGGTGCCAAGAGAATGGCAGTCTTGGGAGACACAGCCTGGGACTTTGGATCAGTTGGAGGCGCTCTCAACTCATTGGGCAAGGGCATC  
CATCAAATTTTTGGAGCAGCTTTCAAATCATTGTTTGGAGGAATGTCTGGTTCTCACAATTTCTCATTGGAACGTTGCTGATGTGGTTGGGTCTGAACACAAAGAATGG  
ATCTATTTCCCTTATGTGCTTGGCCTTAGGGGGAGTGTGATCTTCTTATCCACAGCCGTCTCTGCTGATGTGGGGTGCTCGGTGGACTTCTCAAAGAAGGAGACGAG  
ATGCGGTACAGGGGTGTTCTGTCTATAACGACGTTGAAGCCTGGAGGGACAGGTACAAGTACCATCCTGACTCCCCCGTAGATTGGCAGCAGCAGTCAAGCAAGCCT  
GGGAAGATGGTATCTGCGGGATCTCCTCTGTTTCAAGAATGGAAAACATCATGTGGAGATCAGTAGAAGGGGAGCTCAACGCAATCCTGGAAGAGAATGGAGTTCAAC  
TGACGGTCTGTTGTGGGATCTGTAAAAAACCCCATGTGGAGAGGTCCACAGAGATTGCCCGTGCCTGTGAACGAGCTGCCCCACGGCTGGAAGGCTTGGGGAAATC  
GTACTTCGTGAGAGCAGCAAAGACAAATAACAGCTTTGTCGTGGATGGTGACACACTGAAGGAATGCCCACTCAAACATAGAGCATGGAACAGCTTTCTTGTGGAGGA  
TCATGGGTTCCGGGTATTTCA**TTCTATAGTGTACCTAAATGCGC**

## African Zika virus (Strain MP1751, KY288905, from Uganda, 1962) RPA target

CCAACACAAGGTGAAGCCTACCTTGACAAGCAATCAGACACTCAATATGTTTGCAAAAGAACATTGGTGGACAGAGGTTGGGGAAATGGGTGTGGACTCTTTGGCAA  
GGGAGTTTGGTGACATGTGCTAAGTTCACGTGCTCCAAGAAGATGACTGGGAAGAGCATTACGCCGAGAA

## South American Zika virus (Strain PRVABC59, KU501215, from Puerto Rico, 2015 ) RPA target

CCAACACAAGGTGAAGCCTACCTTGACAAGCAATCAGACACTCAATATGTCTGCAAAAGAACGTTAGTGGACAGAGGCTGGGGAAATGGATGTGGACTTTTTGGCAA  
GGGAGCCTGGTGACATGCGCTAAGTTTGCATGCTCCAAGAAAATGACCGGGAAGAGCATCCAGCCAGAGAA

Sup. Fig. 2

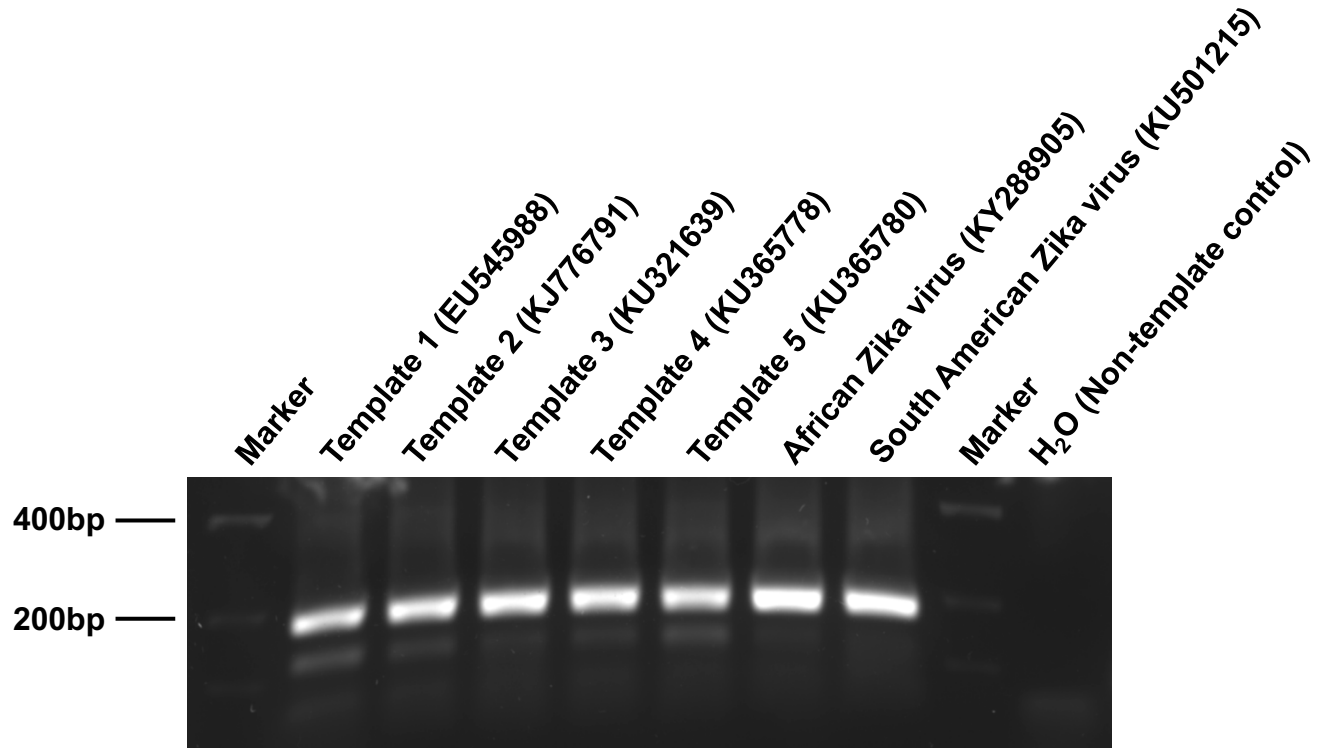

Sup. Fig. 3

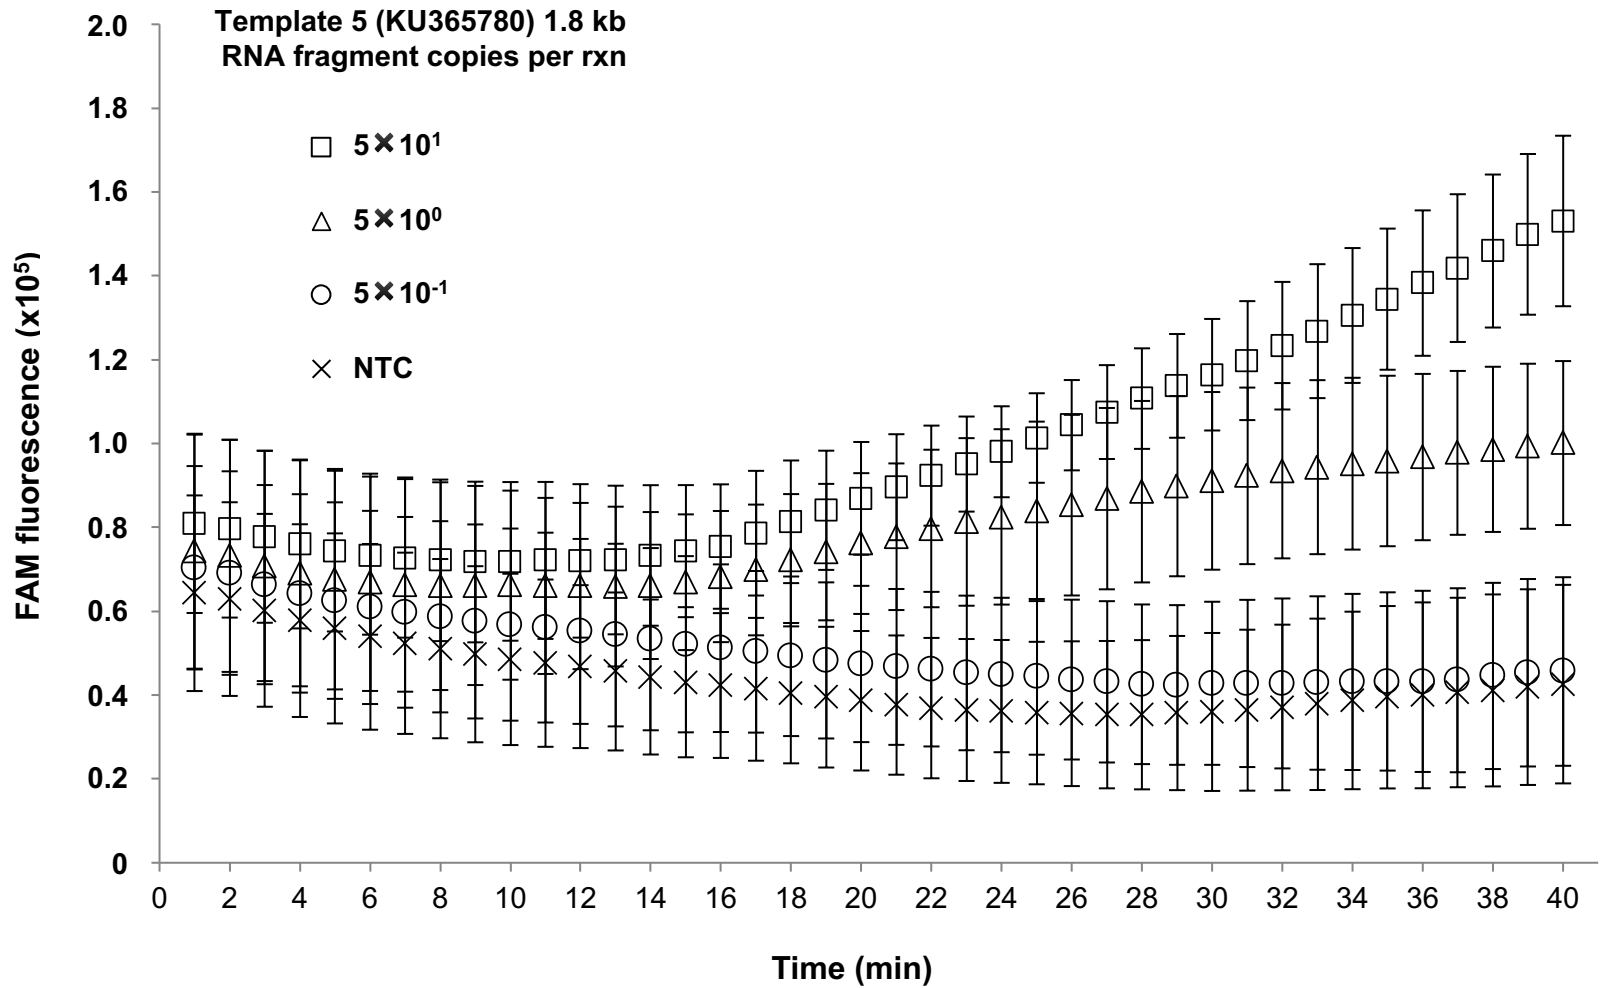



# Sup. Table 1

| Template 5 (KU365780) copies/rxn | RT-RPA TTP (mins) | RT-RPA result | RT-PCR TTP (mins) | RT-PCR result |
|----------------------------------|-------------------|---------------|-------------------|---------------|
| $5 \times 10^1$                  | 21.73             | + (3/5)       | 60.33             | + (3/3)       |
| $5 \times 10^0$                  | 22.20             | + (3/5)       | Not detected      | - (3/3)       |
| $5 \times 10^{-1}$               | Not detected      | - (5/5)       | Not detected      | - (3/3)       |
| NTC                              | Not detected      | - (5/5)       | Not detected      | - (3/3)       |

Sup. Fig. 4

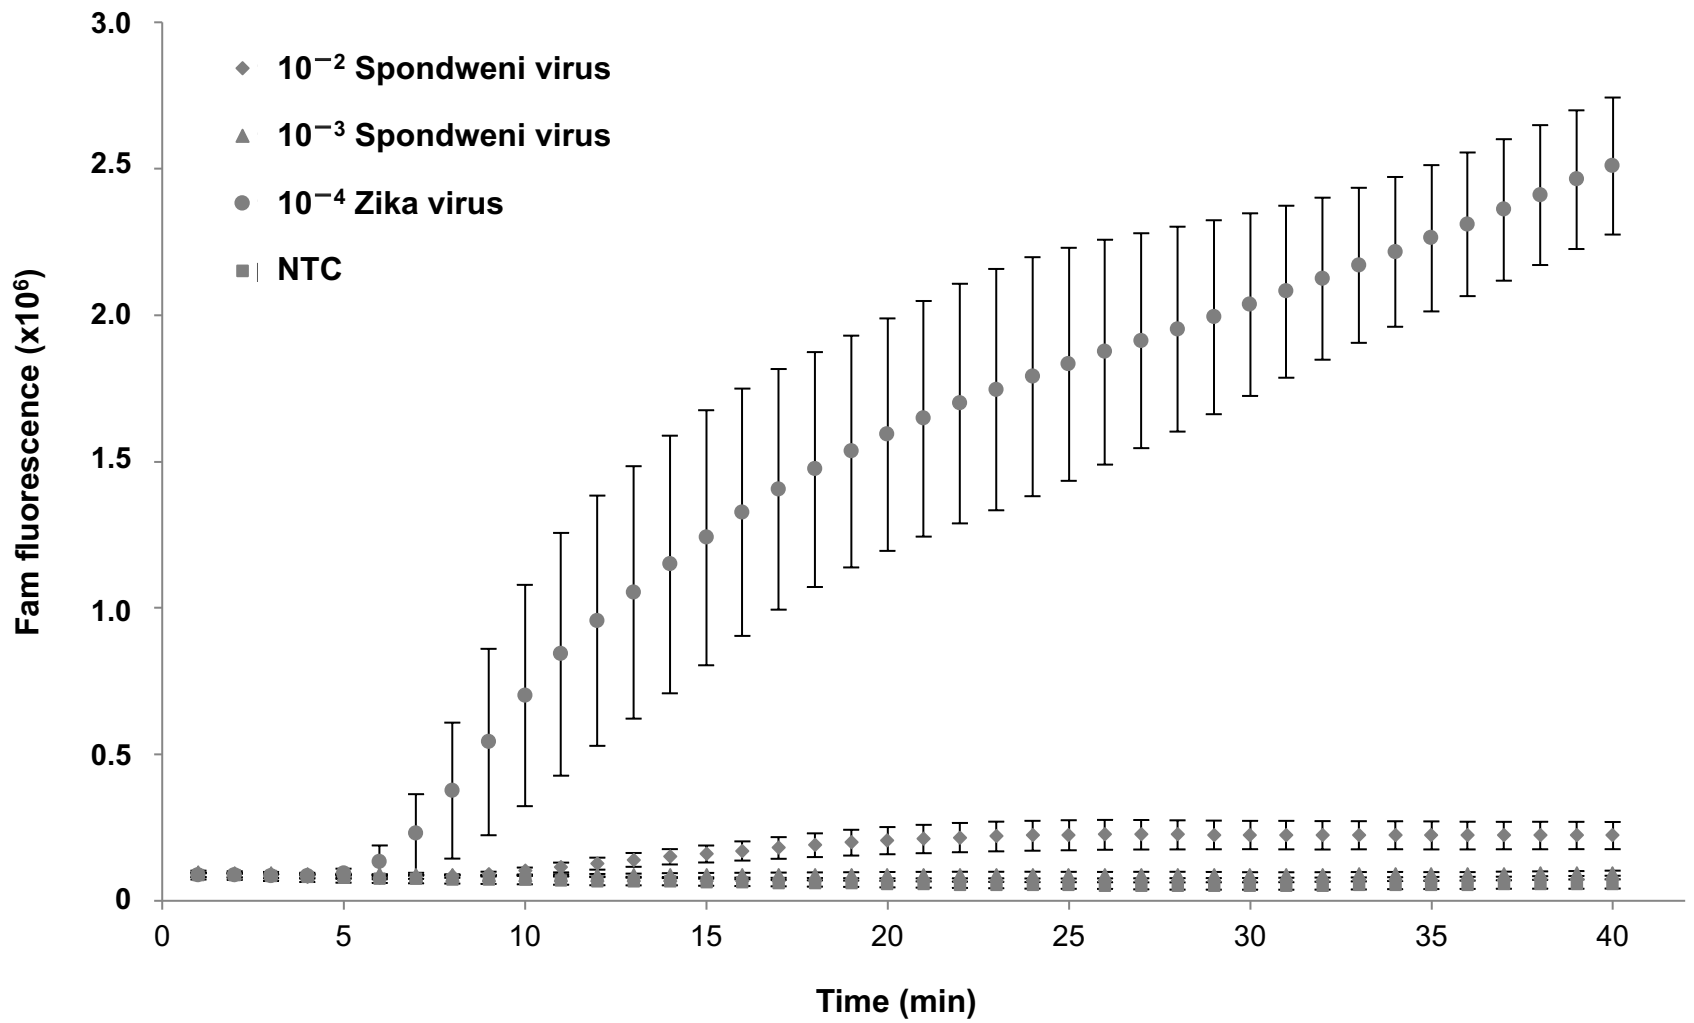

Sup. Table 2

| Sample No | Sample description   | RT-RPA result | RT-PCR Ct | RT-PCR result |
|-----------|----------------------|---------------|-----------|---------------|
| 1         | Dengue clinical      | -             | 27.069    | +             |
| 2         | Dengue clinical      | -             | 32.610    | +             |
| 3         | Dengue clinical      | -             | 35.749    | +             |
| 4         | Dengue clinical      | -             | 24.517    | +             |
| 5         | Dengue clinical      | -             | 36.176    | +             |
| 6         | Dengue clinical      | -             | 24.403    | +             |
| 7         | Dengue clinical      | -             | 22.330    | +             |
| 8         | Dengue clinical      | -             | 23.800    | +             |
| 9         | Dengue clinical      | -             | 26.660    | +             |
| 10        | Dengue clinical      | -             | 33.898    | +             |
| 11        | Dengue clinical      | -             | 34.870    | +             |
| 12        | Chikungunya clinical | -             | 30.412    | +             |
| 13        | Chikungunya clinical | -             | 30.264    | +             |
| 14        | Chikungunya clinical | -             | 39.618    | +             |
| 15        | Chikungunya clinical | -             | 37.512    | +             |
